# Supplementary material for: Daily night-time lights reveal prolonging global electric power system recovery times following tropical cyclone damage
Source: Research Square preprint supplement (doi:10.21203/rs.3.rs-6030545/v1), 2025-02-18
Supplement: Supplementary file 1 [file d901558c73370904944ab8b8.docx]

# Supplementary Information

# Table S1 Number of storms and blackout events from 2012-2022. A blackout event is defined as a storm-urban-cluster pair.

| **Year** | **Number of storms identified from IBTrACS** | **Number of storms with detected NTL blackout** | **Number of blackout events** |
| --- | --- | --- | --- |
| 2012 | 2634 | 30 | 3189 |
| 2013 | 2546 | 42 | 2329 |
| 2014 | 2896 | 38 | 1612 |
| 2015 | 3350 | 33 | 1238 |
| 2016 | 2769 | 33 | 1950 |
| 2017 | 2439 | 40 | 1706 |
| 2018 | 3178 | 47 | 3444 |
| 2019 | 2957 | 39 | 2021 |
| 2020 | 2584 | 51 | 3383 |
| 2021 | 2757 | 43 | 2083 |
| 2022 | 405 | 3 | 7 |
| **Total** | **28515** | **399** | **22962** |

# Table S2 Counties with detected blackouts from 2012-2022.

| **No.** | **Country** | **ISO3** | **Income group** | **Continent** | **Number of storms** | **No.** | **Country** | **ISO3** | **Income group** | **Continent** | **Number of storms** |
| --- | --- | --- | --- | --- | --- | --- | --- | --- | --- | --- | --- |
| **1** | Aruba | ABW | HI | South America | 1 | **34** | Myanmar | MMR | LMI | Asia | 2 |
| **2** | Australia | AUS | HI | Australia | 18 | **35** | Namibia | NAM | UMI | Africa | 1 |
| **3** | Bangladesh | BGD | LMI | Asia | 6 | **36** | New Caledonia | NCL | HI | Australia | 8 |
| **4** | Belize | BLZ | UMI | South America | 4 | **37** | New Zealand | NZL | HI | Australia | 4 |
| **5** | Botswana | BWA | UMI | Africa | 2 | **38** | Nicaragua | NIC | LMI | South America | 3 |
| **6** | Cambodia | KHM | LMI | Asia | 5 | **39** | North Korea | PRK | LI | Asia | 7 |
| **7** | Canada | CAN | HI | North America | 12 | **40** | Norway | NOR | HI | Europe | 1 |
| **8** | **China** | **CHN** | **UMI** | **Asia** | **69** | **41** | Oman | OMN | HI | Asia | 2 |
| **9** | Costa Rica | CRI | UMI | South America | 1 | **42** | Panama | PAN | HI | South America | 1 |
| **10** | Cuba | CUB | UMI | South America | 10 | **43** | Philippines | PHL | LMI | Asia | 36 |
| **11** | Dominican Republic | DOM | UMI | South America | 11 | **44** | Portugal | PRT | HI | Europe | 5 |
| **12** | East Timor | TLS | LMI | Asia | 1 | **45** | Puerto Rico | PRI | HI | South America | 10 |
| **13** | El Salvador | SLV | UMI | South America | 3 | **46** | Russia | RUS | UMI | Europe | 4 |
| **14** | Ethiopia | ETH | LI | Africa | 1 | **47** | Saint Kitts and Nevis | KNA | HI | South America | 1 |
| **15** | Fiji | FJI | UMI | Australia | 4 | **48** | Somalia | SOM | LI | Africa | 3 |
| **16** | France | FRA | HI | Europe | 6 | **49** | Somaliland | SOL | LI | Africa | 3 |
| **17** | Grenada | GRD | UMI | South America | 2 | **50** | South Africa | ZAF | UMI | Africa | 2 |
| **18** | Guatemala | GTM | UMI | South America | 4 | **51** | South Korea | KOR | HI | Asia | 26 |
| **19** | Haiti | HTI | LMI | South America | 6 | **52** | Spain | ESP | HI | Europe | 5 |
| **20** | Honduras | HND | LMI | South America | 8 | **53** | Sri Lanka | LKA | LMI | Asia | 6 |
| **21** | Hong Kong S.A.R. | HKG | HI | Asia | 9 | **54** | Taiwan | TWN | HI | Asia | 24 |
| **22** | India | IND | LMI | Asia | 36 | **55** | Thailand | THA | UMI | Asia | 6 |
| **23** | Indonesia | IDN | UMI | Asia | 2 | **56** | The Bahamas | BHS | HI | South America | 6 |
| **24** | Ireland | IRL | HI | Europe | 4 | **57** | Trinidad and Tobago | TTO | HI | South America | 2 |
| **25** | Jamaica | JAM | UMI | South America | 3 | **58** | United Arab Emirates | ARE | HI | Asia | 1 |
| **26** | **Japan** | **JPN** | **HI** | **Asia** | **53** | **59** | United Kingdom | GBR | HI | Europe | 4 |
| **27** | Laos | LAO | LMI | Asia | 7 | **60** | United Republic of Tanzania | TZA | LMI | Africa | 1 |
| **28** | Madagascar | MDG | LI | Africa | 10 | **61** | United States Virgin Islands | VIR | HI | South America | 8 |
| **29** | Malaysia | MYS | UMI | Asia | 1 | **62** | **United States of America** | **USA** | **HI** | **North America** | **59** |
| **30** | Mauritius | MUS | UMI | Africa | 9 | **63** | Venezuela | VEN | UMI | South America | 2 |
| **31** | **Mexico** | **MEX** | **UMI** | **South America** | **56** | **64** | Vietnam | VNM | LMI | Asia | 34 |
| **32** | Morocco | MAR | LMI | Africa | 1 | **65** | Yemen | YEM | LI | Asia | 2 |
| **33** | Mozambique | MOZ | LI | Africa | 4 | **66** | Zimbabwe | ZWE | LMI | Africa | 2 |

# Table S3 Blackout event variations among urbanization level and income groups and trends over time. Urban level was treated as a categorical factor with three levels: High Density Clusters (HDC), Low Density Clusters (LDC), and Rural (RUR). Year was treated as a covariate in the analysis of covariance analysis.

| *Blackout duration variation among urbanization level and income groups.* | | | | | | |
| --- | --- | --- | --- | --- | --- | --- |
|  | **Factor** | **Df** | **Sum Sq** | **Mean Sq** | **F value** | **Pr (>F)** |
| ***ANOVA: duration ~ urban level*** | Urban level | 2 | 437.4 | 218.7 | 12.37 | **<0.001** |
| Residuals | 22959 | 406036.4 | 17.69 | - | - |
|  | **Level** | **n** | **Mean** | **Std** | **-** | **Group** |
| **Tukey’s post hoc for urban level** | HDC | 1906 | 4.88 | 5.16 | - | a |
| LDC | 8155 | 4.42 | 4.33 | - | b |
| RUR | 12901 | 4.36 | 3.96 | - | b |
| *Test for temporal trends.* | | | | | | |
|  | **Factor** |  | **Estimate** | **Std. Error** | **t value** | **Pr(>|t|)** |
| **Number of blackouts ~ year** | (Intercept) | - | -23.38 | 4.63 | -5.04 | **<0.001** |
| Year | - | 0.0154 | 0.0022 | 6.71 | **<0.001** |
| **Number of storms with blackouts detected ~ year** | (Intercept) | - | -68.70 | 35.40 | -1.94 | **0.05** |
| Year | - | 0.0359 | 0.018 | 2.04 | **0.04** |
| **Number of storms recorded** | (Intercept) | - | 4.32 | 4.19 | 1.03 | 0.30 |
| Year | - | 0.0018 | 0.0021 | 0.86 | 0.39 |
| ***Full model:***  **Duration ~ urban level * year** | (Intercept) |  | -170.07 | 72.92 | -2.33 | **0.020** |
| urbaNTLevelLDC |  | -27.69 | 80.53 | -0.34 | 0.73 |
| urbaNTLevelRUR |  | -167.13 | 78.17 | -2.14 | **0.03** |
| year |  | 0.087 | 0.036 | 2.42 | 0.016 |
| urbaNTLevelLDC:year |  | 0.014 | 0.040 | 0.34 | 0.73 |
| urbaNTLevelRUR:year |  | 0.083 | 0.039 | 2.13 | **0.033** |
| **For HDC & LDC** | (Intercept) |  | -337.19 | 27.15 | -12.42 | **<0.001** |
| Year |  | 0.17 | 0.013 | 12.63 | **<0.001** |
| **For RUR** | (Intercept) |  | -197.42 | 32.32 | -6.11 | **<0.001** |
| Year |  | 0.10 | 0.016 | 6.29 | **<0.001** |

# Table S4 Changes in blackout duration and frequency of storms with blackouts detected for high income countries.

| **ISO3** | **Coefficients** | **Blackout duration** | | | | **Storm frequency** | | | |
| --- | --- | --- | --- | --- | --- | --- | --- | --- | --- |
| **Estimate** | **Std. Error** | **t value** | **Pr(>|t|)** | **Estimate** | **Std. Error** | **t value** | **Pr(>|t|)** |
| ARE | (Intercept) | 4.7 | 0.75 | 6.3 | 0.1 | 4.7e-11 | 1 | 4.7e-11 | 1 |
| AUS | (Intercept) | 1500 | 2400 | 0.63 | 0.531 | 47 | 180 | 0.27 | 0.791 |
| AUS | urbaNTLevelLDC | -360 | 2500 | -0.14 | 0.887 | - | - | - | - |
| AUS | urbaNTLevelRUR | -2200 | 2500 | -0.88 | 0.382 | - | - | - | - |
| AUS | year | -0.75 | 1.2 | -0.63 | 0.533 | -0.023 | 0.087 | -0.26 | 0.795 |
| AUS | urbaNTLevelLDC:year | 0.18 | 1.3 | 0.14 | 0.887 | - | - | - | - |
| AUS | urbaNTLevelRUR:year | 1.1 | 1.2 | 0.88 | 0.382 | - | - | - | - |
| CAN | (Intercept) | -590 | 1300 | -0.45 | 0.668 | 140 | 270 | 0.51 | 0.607 |
| CAN | urbaNTLevelLDC | -0.59 | 7.2 | -0.082 | 0.937 | - | - | - | - |
| CAN | urbaNTLevelRUR | 0.3 | 0.65 | 0.46 | 0.664 | -0.067 | 0.13 | -0.51 | 0.608 |
| CAN | year | 1000 | 2900 | 0.36 | 0.718 | -350 | 240 | -1.5 | 0.147 |
| CAN | urbaNTLevelLDC:year | -240 | 3000 | -0.081 | 0.935 | - | - | - | - |
| CAN | urbaNTLevelRUR:year | -1200 | 2900 | -0.41 | 0.686 | - | - | - | - |
| ESP | (Intercept) | -0.51 | 1.4 | -0.36 | 0.719 | 0.17 | 0.12 | 1.5 | 0.146 |
| ESP | urbaNTLevelLDC | 0.12 | 1.5 | 0.082 | 0.935 | - | - | - | - |
| ESP | urbaNTLevelRUR | 0.58 | 1.4 | 0.41 | 0.686 | - | - | - | - |
| ESP | year | -460 | 350 | -1.3 | 0.2 | -78 | 300 | -0.26 | 0.797 |
| ESP | urbaNTLevelLDC:year | -2200 | 960 | -2.2 | **0.029** | - | - | - | - |
| FRA | (Intercept) | 2.6 | 4.2 | 0.62 | 0.535 | - | - | - | - |
| FRA | urbaNTLevelLDC | 0.23 | 0.17 | 1.3 | 0.198 | 0.039 | 0.15 | 0.26 | 0.797 |
| FRA | urbaNTLevelRUR | 1.1 | 0.48 | 2.3 | **0.028** | - | - | - | - |
| FRA | year | 4 | 1600 | 0.0026 | 0.998 | 4.7e-11 | 310 | 1.5e-13 | 1 |
| FRA | urbaNTLevelLDC:year | 490 | 1700 | 0.28 | 0.782 | - | - | - | - |
| FRA | urbaNTLevelRUR:year | 1300 | 1700 | 0.78 | 0.447 | - | - | - | - |
| GBR | (Intercept) | -7.80E-13 | 0.78 | -1.00E-12 | 1 | -3.00E-19 | 0.15 | -2.00E-18 | 1 |
| GBR | urbaNTLevelLDC | -0.24 | 0.87 | -0.28 | 0.781 | - | - | - | - |
| GBR | urbaNTLevelRUR | -0.64 | 0.82 | -0.78 | 0.447 | - | - | - | - |
| GBR | year | 11000 | 7300 | 1.6 | 0.131 | -770 | 1300 | -0.6 | 0.545 |
| GBR | urbaNTLevelLDC:year | -10000 | 8400 | -1.2 | 0.244 | - | - | - | - |
| GBR | urbaNTLevelRUR:year | 380 | 10000 | 0.037 | 0.971 | - | - | - | - |
| HKG | (Intercept) | -5.6 | 3.6 | -1.6 | 0.131 | 0.38 | 0.64 | 0.6 | 0.545 |
| HKG | urbaNTLevelRUR | 4.9 | 4.1 | 1.2 | 0.244 | - | - | - | - |
| HKG | year | -0.19 | 5.1 | -0.037 | 0.971 | - | - | - | - |
| HKG | urbaNTLevelRUR:year | 1.5 | 13000 | 0.00012 | 1 | -110 | 280 | -0.4 | 0.69 |
| IRL | (Intercept) | -230 | 13000 | -0.018 | 0.986 | - | - | - | - |
| IRL | urbaNTLevelRUR | 6 | 32 | 0.19 | 0.855 | - | - | - | - |
| IRL | year | 5.6e-15 | 6.2 | 9e-16 | 1 | 0.055 | 0.14 | 0.4 | 0.689 |
| IRL | urbaNTLevelRUR:year | 0.12 | 6.3 | 0.018 | 0.986 | - | - | - | - |
| JPN | (Intercept) | -5000 | 9800 | -0.51 | 0.612 | -770 | 1300 | -0.6 | 0.545 |
| JPN | urbaNTLevelLDC | 24000 | 21000 | 1.1 | 0.276 | - | - | - | - |
| JPN | urbaNTLevelRUR | 2.5 | 4.9 | 0.51 | 0.611 | 0.38 | 0.64 | 0.6 | 0.545 |
| JPN | year | -12 | 11 | -1.1 | 0.276 | - | - | - | - |
| JPN | urbaNTLevelLDC:year | -280 | 260 | -1.1 | 0.286 | 27 | 96 | 0.28 | 0.779 |
| JPN | urbaNTLevelRUR:year | -250 | 290 | -0.86 | 0.388 | - | - | - | - |
| KOR | (Intercept) | 120 | 280 | 0.44 | 0.657 | - | - | - | - |
| KOR | urbaNTLevelLDC | 0.14 | 0.13 | 1.1 | 0.276 | -0.013 | 0.048 | -0.26 | 0.793 |
| KOR | urbaNTLevelRUR | 0.12 | 0.14 | 0.86 | 0.388 | - | - | - | - |
| KOR | year | -0.062 | 0.14 | -0.45 | 0.656 | - | - | - | - |
| KOR | urbaNTLevelLDC:year | -550 | 480 | -1.1 | 0.257 | -28 | 130 | -0.22 | 0.83 |
| KOR | urbaNTLevelRUR:year | -190 | 530 | -0.36 | 0.72 | - | - | - | - |
| NCL | (Intercept) | 71 | 500 | 0.14 | 0.886 | - | - | - | - |
| NCL | year | 0.27 | 0.24 | 1.2 | 0.25 | 0.014 | 0.065 | 0.22 | 0.823 |
| NOR | (Intercept) | 0.094 | 0.26 | 0.36 | 0.722 | - | - | - | - |
| NOR | urbaNTLevelLDC | -0.036 | 0.25 | -0.15 | 0.883 | - | - | - | - |
| NOR | urbaNTLevelRUR | 1800 | 880 | 2 | 0.063 | 5.8 | 260 | 0.022 | 0.982 |
| NZL | (Intercept) | -0.89 | 0.44 | -2 | **0.064** | -0.0028 | 0.13 | -0.022 | 0.983 |
| NZL | urbaNTLevelRUR | 7 | 0.78 | 8.9 | **<0.001** | 4.7e-11 | 1 | 4.7e-11 | 1 |
| NZL | year | -4.6 | 0.86 | -5.4 | **<0.001** | - | - | - | - |
| OMN | (Intercept) | -5.1 | 0.81 | -6.3 | **<0.001** | - | - | - | - |
| OMN | urbaNTLevelLDC | 1800 | 880 | 2 | 0.057 | 0.29 | 1200 | 0.00023 | 1 |
| OMN | urbaNTLevelRUR | -0.66 | 1.2 | -0.56 | 0.582 | - | - | - | - |
| OMN | year | -0.88 | 0.44 | -2 | 0.057 | -6.60E-14 | 0.61 | -1.10E-13 | 1 |
| OMN | urbaNTLevelLDC:year | 1400 | 2000 | 0.71 | 0.484 | 4.7e-11 | 950 | 4.9e-14 | 1 |
| PAN | (Intercept) | 3.7 | 4.1 | 0.92 | 0.367 | - | - | - | - |
| PRI | (Intercept) | 0.37 | 4 | 0.091 | 0.928 | - | - | - | - |
| PRI | urbaNTLevelLDC | -0.71 | 1 | -0.71 | 0.485 | -2.90E-19 | 0.47 | -6.10E-19 | 1 |
| PRI | urbaNTLevelRUR | 9.8 | 2.1 | 4.7 | **0.042** | 4.7e-11 | 1 | 4.7e-11 | 1 |
| PRI | year | -16000 | 5200 | -3.1 | **0.003** | -200 | 260 | -0.77 | 0.439 |
| PRI | urbaNTLevelLDC:year | 17000 | 5200 | 3.3 | **0.002** | - | - | - | - |
| PRI | urbaNTLevelRUR:year | 16000 | 5400 | 3 | **0.004** | - | - | - | - |
| PRT | (Intercept) | 8 | 2.6 | 3.1 | **0.003** | 0.1 | 0.13 | 0.78 | 0.438 |
| PRT | urbaNTLevelLDC | -8.6 | 2.6 | -3.3 | **0.002** | - | - | - | - |
| PRT | urbaNTLevelRUR | -8 | 2.7 | -3 | **0.004** | - | - | - | - |
| PRT | year | -450 | 1300 | -0.34 | 0.731 | -78 | 300 | -0.26 | 0.797 |
| PRT | urbaNTLevelLDC:year | 140 | 1400 | 0.1 | 0.918 | - | - | - | - |
| PRT | urbaNTLevelRUR:year | -260 | 1400 | -0.19 | 0.851 | - | - | - | - |
| TTO | (Intercept) | 0.23 | 0.65 | 0.35 | 0.729 | 0.039 | 0.15 | 0.26 | 0.797 |
| TTO | urbaNTLevelRUR | -0.071 | 0.69 | -0.1 | 0.919 | - | - | - | - |
| TTO | year | 0.13 | 0.68 | 0.19 | 0.85 | - | - | - | - |
| TTO | urbaNTLevelRUR:year | -1600 | 2200 | -0.72 | 0.493 | 4.7e-11 | 950 | 4.9e-14 | 1 |
| TWN | (Intercept) | 560 | 3700 | 0.15 | 0.883 | - | - | - | - |
| TWN | urbaNTLevelLDC | 0.78 | 1.1 | 0.73 | 0.492 | -2.90E-19 | 0.47 | -6.10E-19 | 1 |
| TWN | urbaNTLevelRUR | -0.28 | 1.8 | -0.15 | 0.883 | - | - | - | - |
| TWN | year | 490 | 570 | 0.86 | 0.389 | 210 | 150 | 1.4 | 0.157 |
| TWN | urbaNTLevelLDC:year | -230 | 660 | -0.36 | 0.722 | - | - | - | - |
| TWN | urbaNTLevelRUR:year | -210 | 640 | -0.33 | 0.738 | - | - | - | - |
| USA | (Intercept) | -0.24 | 0.28 | -0.85 | 0.396 | -0.1 | 0.073 | -1.4 | 0.159 |
| USA | urbaNTLevelLDC | 0.12 | 0.33 | 0.35 | 0.723 | - | - | - | - |
| USA | urbaNTLevelRUR | 0.1 | 0.32 | 0.33 | 0.74 | - | - | - | - |
| USA | year | 180 | 190 | 0.94 | 0.348 | -270 | 96 | -2.9 | **0.004** |
| USA | urbaNTLevelLDC:year | -100 | 210 | -0.5 | 0.617 | - | - | - | - |
| VIR | (Intercept) | -170 | 220 | -0.74 | 0.458 | - | - | - | - |
| VIR | urbaNTLevelRUR | -0.087 | 0.095 | -0.92 | 0.36 | 0.14 | 0.047 | 2.9 | **0.004** |
| VIR | year | 0.052 | 0.1 | 0.5 | 0.616 | - | - | - | - |

# Table S5 Changes in blackout duration and frequency of storms with blackouts detected for upper middle-income countries.

| **ISO3** | **Coefficients** | **Blackout duration** | | | | **Storm frequency** | | | |
| --- | --- | --- | --- | --- | --- | --- | --- | --- | --- |
| **Estimate** | **Std. Error** | **t value** | **Pr(>|t|)** | **Estimate** | **Std. Error** | **t value** | **Pr(>|t|)** |
| BLZ | (Intercept) | -240 | 780 | -0.31 | 0.763 | -190 | 290 | -0.67 | 0.501 |
| BLZ | urbaNTLevelRUR | 780 | 980 | 0.79 | 0.453 | - | - | - | - |
| BLZ | year | 0.12 | 0.39 | 0.32 | 0.759 | 0.096 | 0.14 | 0.67 | 0.5 |
| BLZ | urbaNTLevelRUR:year | -0.38 | 0.49 | -0.79 | 0.454 | - | - | - | - |
| BWA | (Intercept) | 8.7 | 1.8 | 4.7 | **0** | 0.69 | 0.71 | 0.98 | 0.327 |
| BWA | urbaNTLevelRUR | 310 | 130 | 2.4 | **0.018** | 130 | 85 | 1.5 | 0.122 |
| CHN | (Intercept) | -280 | 140 | -1.9 | 0.056 | - | - | - | - |
| CHN | urbaNTLevelLDC | -290 | 140 | -2.1 | **0.037** | - | - | - | - |
| CHN | urbaNTLevelRUR | -0.15 | 0.066 | -2.3 | **0.021** | -0.065 | 0.042 | -1.5 | 0.127 |
| CHN | year | 0.14 | 0.072 | 1.9 | 0.056 | - | - | - | - |
| CHN | urbaNTLevelLDC:year | 0.15 | 0.07 | 2.1 | **0.037** | - | - | - | - |
| CHN | urbaNTLevelRUR:year | 8.5 | 8.3 | 1 | 0.35 | 4.7e-11 | 1 | 4.7e-11 | 1 |
| CRI | (Intercept) | -6 | 12 | -0.51 | 0.629 | - | - | - | - |
| CRI | urbaNTLevelLDC | 1.6 | 8.9 | 0.18 | 0.866 | - | - | - | - |
| CRI | urbaNTLevelRUR | 1000 | 610 | 1.7 | 0.095 | -81 | 210 | -0.39 | 0.695 |
| CUB | (Intercept) | -24 | 720 | -0.033 | 0.973 | - | - | - | - |
| CUB | urbaNTLevelLDC | -560 | 660 | -0.85 | 0.396 | - | - | - | - |
| CUB | urbaNTLevelRUR | -0.5 | 0.3 | -1.7 | 0.097 | 0.041 | 0.1 | 0.4 | 0.692 |
| CUB | year | 0.01 | 0.36 | 0.029 | 0.977 | - | - | - | - |
| CUB | urbaNTLevelLDC:year | 0.28 | 0.33 | 0.85 | 0.398 | - | - | - | - |
| CUB | urbaNTLevelRUR:year | -1200 | 880 | -1.4 | 0.171 | -260 | 210 | -1.2 | 0.232 |
| DOM | (Intercept) | 1300 | 1000 | 1.2 | 0.214 | - | - | - | - |
| DOM | urbaNTLevelLDC | 870 | 940 | 0.92 | 0.357 | - | - | - | - |
| DOM | urbaNTLevelRUR | 0.6 | 0.44 | 1.4 | 0.168 | 0.13 | 0.11 | 1.2 | 0.231 |
| DOM | year | -0.63 | 0.51 | -1.2 | 0.213 | - | - | - | - |
| DOM | urbaNTLevelLDC:year | -0.43 | 0.47 | -0.93 | 0.356 | - | - | - | - |
| DOM | urbaNTLevelRUR:year | 1000 | 970 | 1.1 | 0.33 | -110 | 490 | -0.23 | 0.818 |
| FJI | (Intercept) | 2.8 | 3.2 | 0.88 | 0.42 | - | - | - | - |
| FJI | urbaNTLevelRUR | 3.1 | 2.8 | 1.1 | 0.322 | - | - | - | - |
| FJI | year | -0.52 | 0.48 | -1.1 | 0.33 | 0.056 | 0.24 | 0.23 | 0.817 |
| GTM | (Intercept) | 2600 | 1600 | 1.6 | 0.117 | -260 | 430 | -0.6 | 0.546 |
| GTM | urbaNTLevelRUR | -1700 | 3500 | -0.48 | 0.635 | - | - | - | - |
| GTM | year | 6.8 | 6 | 1.1 | 0.271 | - | - | - | - |
| GTM | urbaNTLevelRUR:year | -1.3 | 0.78 | -1.6 | 0.118 | 0.13 | 0.21 | 0.6 | 0.545 |
| IDN | (Intercept) | 0.85 | 1.8 | 0.48 | 0.634 | - | - | - | - |
| IDN | urbaNTLevelLDC | -3800 | 680 | -5.6 | **<0.001** | 4.7e-11 | 710 | 6.6e-14 | 1 |
| IDN | urbaNTLevelRUR | -1100 | 1200 | -0.91 | 0.367 | - | - | - | - |
| IDN | year | -0.98 | 0.7 | -1.4 | 0.163 | - | - | - | - |
| IDN | urbaNTLevelLDC:year | 1.9 | 0.34 | 5.6 | **<0.001** | -2.20E-19 | 0.35 | -6.10E-19 | 1 |
| IDN | urbaNTLevelRUR:year | 0.53 | 0.58 | 0.91 | 0.367 | - | - | - | - |
| JAM | (Intercept) | -250 | 1000 | -0.25 | 0.806 | 4.7e-11 | 290 | 1.6e-13 | 1 |
| JAM | urbaNTLevelLDC | 960 | 1100 | 0.85 | 0.406 | - | - | - | - |
| JAM | urbaNTLevelRUR | 710 | 1100 | 0.62 | 0.539 | - | - | - | - |
| JAM | year | 0.13 | 0.5 | 0.25 | 0.805 | -1.60E-19 | 0.14 | -1.10E-18 | 1 |
| JAM | urbaNTLevelLDC:year | -0.47 | 0.56 | -0.84 | 0.407 | - | - | - | - |
| JAM | urbaNTLevelRUR:year | -0.35 | 0.56 | -0.62 | 0.54 | - | - | - | - |
| MEX | (Intercept) | 4.7 | 410 | 0.011 | 0.991 | -51 | 94 | -0.54 | 0.589 |
| MEX | urbaNTLevelLDC | -480 | 480 | -1 | 0.317 | - | - | - | - |
| MEX | urbaNTLevelRUR | 320 | 430 | 0.75 | 0.455 | - | - | - | - |
| MEX | year | 0.0016 | 0.2 | 0.0079 | 0.994 | 0.026 | 0.047 | 0.56 | 0.577 |
| MEX | urbaNTLevelLDC:year | 0.24 | 0.24 | 1 | 0.319 | - | - | - | - |
| MEX | urbaNTLevelRUR:year | -0.16 | 0.21 | -0.75 | 0.451 | - | - | - | - |
| MUS | (Intercept) | 260 | 2500 | 0.1 | 0.921 | -180 | 240 | -0.74 | 0.461 |
| MUS | urbaNTLevelLDC | -110 | 2700 | -0.041 | 0.968 | - | - | - | - |
| MUS | urbaNTLevelRUR | 2700 | 2900 | 0.94 | 0.361 | - | - | - | - |
| MUS | year | -0.13 | 1.3 | -0.1 | 0.922 | 0.088 | 0.12 | 0.74 | 0.46 |
| MUS | urbaNTLevelLDC:year | 0.056 | 1.3 | 0.042 | 0.967 | - | - | - | - |
| MUS | urbaNTLevelRUR:year | -1.4 | 1.4 | -0.94 | 0.361 | - | - | - | - |
| MYS | (Intercept) | 4.8 | 1 | 4.9 | **<0.001** | 4.7e-11 | 1 | 4.7e-11 | 1 |
| NAM | (Intercept) | 13 | 6.8 | 1.9 | 0.31 | 4.7e-11 | 1 | 4.7e-11 | 1 |
| RUS | (Intercept) | 1700 | 980 | 1.7 | 0.15 | 190 | 320 | 0.61 | 0.545 |
| RUS | urbaNTLevelRUR | 7.3 | 5.5 | 1.3 | 0.243 | - | - | - | - |
| RUS | year | -0.83 | 0.49 | -1.7 | 0.151 | -0.096 | 0.16 | -0.6 | 0.545 |
| SLV | (Intercept) | 680 | 3500 | 0.19 | 0.854 | -470 | 820 | -0.57 | 0.572 |
| SLV | urbaNTLevelLDC | -2 | 4.5 | -0.45 | 0.675 | - | - | - | - |
| SLV | urbaNTLevelRUR | -540 | 4400 | -0.12 | 0.908 | - | - | - | - |
| SLV | year | -0.33 | 1.7 | -0.19 | 0.855 | 0.23 | 0.41 | 0.57 | 0.571 |
| SLV | urbaNTLevelLDC:year | 0.27 | 2.2 | 0.12 | 0.908 | - | - | - | - |
| THA | (Intercept) | 2200 | 1900 | 1.2 | 0.252 | 150 | 310 | 0.48 | 0.632 |
| THA | urbaNTLevelLDC | -1500 | 2000 | -0.76 | 0.446 | - | - | - | - |
| THA | urbaNTLevelRUR | -1300 | 2000 | -0.67 | 0.504 | - | - | - | - |
| THA | year | -1.1 | 0.96 | -1.1 | 0.253 | -0.074 | 0.15 | -0.48 | 0.632 |
| THA | urbaNTLevelLDC:year | 0.76 | 1 | 0.76 | 0.446 | - | - | - | - |
| THA | urbaNTLevelRUR:year | 0.65 | 0.97 | 0.67 | 0.504 | - | - | - | - |
| VEN | (Intercept) | 11000 | 340 | 34 | **0.019** | 4.7e-11 | 950 | 4.9e-14 | 1 |
| VEN | urbaNTLevelLDC | -3900 | 450 | -8.7 | 0.073 | - | - | - | - |
| VEN | urbaNTLevelRUR | -5.7 | 0.17 | -34 | 0.019 | -2.90E-19 | 0.47 | -6.10E-19 | 1 |
| VEN | year | 1.9 | 0.22 | 8.7 | 0.073 | - | - | - | - |
| VEN | urbaNTLevelLDC:year | 1.5 | 2.9 | 0.52 | 0.628 | 0.69 | 0.71 | 0.98 | 0.327 |
| ZAF | (Intercept) | 0.38 | 3.3 | 0.12 | 0.913 | - | - | - | - |
| ZAF | urbaNTLevelRUR | 2.8 | 3.4 | 0.84 | 0.438 | - | - | - | - |

# Table S6 Changes in blackout duration and frequency of storms with blackouts detected for lower middle-income countries.

| **ISO3** | **Coefficient** | **Blackout duration** | | | | **Storm frequency** | | | |
| --- | --- | --- | --- | --- | --- | --- | --- | --- | --- |
| **Estimate** | **Std. Error** | **t value** | **Pr(>|t|)** | **Estimate** | **Std. Error** | **t value** | **Pr(>|t|)** |
| BGD | (Intercept) | 1000 | 420 | 2.4 | 0.016 | -120 | 350 | -0.33 | 0.74 |
| BGD | urbaNTLevelLDC | -1700 | 1000 | -1.7 | 0.086 | - | - | - | - |
| BGD | urbaNTLevelRUR | -940 | 630 | -1.5 | 0.137 | - | - | - | - |
| BGD | year | -0.51 | 0.21 | -2.4 | **0.016** | 0.057 | 0.17 | 0.33 | 0.739 |
| BGD | urbaNTLevelLDC:year | 0.86 | 0.5 | 1.7 | 0.086 | - | - | - | - |
| BGD | urbaNTLevelRUR:year | 0.47 | 0.31 | 1.5 | 0.138 | - | - | - | - |
| HND | (Intercept) | -710 | 1500 | -0.47 | 0.644 | -300 | 240 | -1.2 | 0.212 |
| HND | urbaNTLevelLDC | 370 | 2200 | 0.17 | 0.868 | - | - | - | - |
| HND | urbaNTLevelRUR | 1.8 | 5.2 | 0.35 | 0.727 | - | - | - | - |
| HND | year | 0.35 | 0.75 | 0.47 | 0.64 | 0.15 | 0.12 | 1.3 | 0.211 |
| HND | urbaNTLevelLDC:year | -0.19 | 1.1 | -0.17 | 0.867 | - | - | - | - |
| HTI | (Intercept) | -320 | 480 | -0.67 | 0.506 | -87 | 280 | -0.31 | 0.756 |
| HTI | urbaNTLevelLDC | 690 | 520 | 1.3 | 0.187 | - | - | - | - |
| HTI | urbaNTLevelRUR | 420 | 520 | 0.81 | 0.422 | - | - | - | - |
| HTI | year | 0.16 | 0.24 | 0.68 | 0.5 | 0.043 | 0.14 | 0.31 | 0.755 |
| HTI | urbaNTLevelLDC:year | -0.34 | 0.26 | -1.3 | 0.187 | - | - | - | - |
| HTI | urbaNTLevelRUR:year | -0.21 | 0.26 | -0.81 | 0.422 | - | - | - | - |
| IND | (Intercept) | -730 | 150 | -5 | **<0.001** | -190 | 120 | -1.6 | 0.109 |
| IND | urbaNTLevelLDC | -180 | 170 | -1 | 0.294 | - | - | - | - |
| IND | urbaNTLevelRUR | -380 | 160 | -2.4 | 0.018 | - | - | - | - |
| IND | year | 0.37 | 0.073 | 5 | **<0.001** | 0.096 | 0.059 | 1.6 | 0.107 |
| IND | urbaNTLevelLDC:year | 0.088 | 0.084 | 1 | 0.295 | - | - | - | - |
| IND | urbaNTLevelRUR:year | 0.19 | 0.08 | 2.4 | **0.018** | - | - | - | - |
| KHM | (Intercept) | 3500 | 1200 | 2.8 | 0.105 | -180 | 320 | -0.58 | 0.562 |
| KHM | urbaNTLevelRUR | -1300 | 1400 | -0.93 | 0.449 | - | - | - | - |
| KHM | year | -1.7 | 0.62 | -2.8 | 0.106 | 0.092 | 0.16 | 0.58 | 0.562 |
| KHM | urbaNTLevelRUR:year | 0.64 | 0.69 | 0.93 | 0.45 | - | - | - | - |
| LAO | (Intercept) | 970 | 430 | 2.3 | **0.03** | -160 | 310 | -0.53 | 0.599 |
| LAO | urbaNTLevelLDC | 4.3 | 760 | 0.0057 | 0.995 | - | - | - | - |
| LAO | urbaNTLevelRUR | 1.6 | 2.8 | 0.58 | 0.567 | - | - | - | - |
| LAO | year | -0.48 | 0.21 | -2.3 | **0.031** | 0.081 | 0.15 | 0.53 | 0.598 |
| LAO | urbaNTLevelLDC:year | -0.0017 | 0.38 | -0.0044 | 0.997 | - | - | - | - |
| LKA | (Intercept) | -520 | 2900 | -0.18 | 0.862 | 88 | 280 | 0.32 | 0.75 |
| LKA | urbaNTLevelLDC | 3500 | 3800 | 0.93 | 0.358 | - | - | - | - |
| LKA | urbaNTLevelRUR | 440 | 3200 | 0.14 | 0.89 | - | - | - | - |
| LKA | year | 0.26 | 1.5 | 0.18 | 0.86 | -0.044 | 0.14 | -0.32 | 0.75 |
| LKA | urbaNTLevelLDC:year | -1.7 | 1.9 | -0.93 | 0.358 | - | - | - | - |
| LKA | urbaNTLevelRUR:year | -0.22 | 1.6 | -0.14 | 0.89 | - | - | - | - |
| MAR | (Intercept) | 2.5 | 0.91 | 2.8 | **0.016** | 4.7e-11 | 1 | 4.7e-11 | 1 |
| MAR | urbanLevelLDC | -0.29 | 1 | -0.28 | 0.785 | - | - | - | - |
| MAR | urbanLevelRUR | -0.21 | 1 | -0.21 | 0.838 | - | - | - | - |
| MMR | (Intercept) | 2300 | 1700 | 1.3 | 0.31 | 4.7e-11 | 710 | 6.6e-14 | 1 |
| MMR | urbanLevelLDC | 7 | 3.3 | 2.1 | 0.171 | - | - | - | - |
| MMR | urbanLevelRUR | 0.83 | 2.7 | 0.31 | 0.789 | - | - | - | - |
| MMR | year | -1.1 | 0.84 | -1.3 | 0.31 | -2.20E-19 | 0.35 | -6.10E-19 | 1 |
| NIC | (Intercept) | -74 | 1400 | -0.053 | 0.959 | 4.7e-11 | 470 | 1e-13 | 1 |
| NIC | urbanLevelLDC | 10 | 6.3 | 1.6 | 0.156 | - | - | - | - |
| NIC | urbanLevelRUR | -6.2 | 4.1 | -1.5 | 0.181 | - | - | - | - |
| NIC | year | 0.042 | 0.69 | 0.06 | 0.954 | -2.80E-19 | 0.23 | -1.20E-18 | 1 |
| PHL | (Intercept) | 270 | 490 | 0.55 | 0.584 | 28 | 120 | 0.24 | 0.808 |
| PHL | urbanLevelLDC | -170 | 520 | -0.33 | 0.742 | - | - | - | - |
| PHL | urbanLevelRUR | -38 | 520 | -0.072 | 0.942 | - | - | - | - |
| PHL | year | -0.13 | 0.24 | -0.53 | 0.594 | -0.013 | 0.058 | -0.23 | 0.816 |
| PHL | urbanLevelLDC:year | 0.084 | 0.26 | 0.33 | 0.742 | - | - | - | - |
| PHL | urbanLevelRUR:year | 0.018 | 0.26 | 0.072 | 0.943 | - | - | - | - |
| TLS | (Intercept) | 2 | 0.5 | 4 | **0.028** | 4.7e-11 | 1 | 4.7e-11 | 1 |
| TZA | (Intercept) | 3 | 1.8 | 1.7 | 0.339 | 4.7e-11 | 1 | 4.7e-11 | 1 |
| TZA | urbanLevelLDC | 0.5 | 2.5 | 0.2 | 0.874 | - | - | - | - |
| TZA | urbanLevelRUR | -0.75 | 2.2 | -0.35 | 0.788 | - | - | - | - |
| VNM | (Intercept) | -510 | 390 | -1.3 | 0.193 | -28 | 120 | -0.23 | 0.819 |
| VNM | urbanLevelLDC | 450 | 460 | 0.99 | 0.322 | - | - | - | - |
| VNM | urbanLevelRUR | 650 | 440 | 1.5 | 0.139 | - | - | - | - |
| VNM | year | 0.26 | 0.19 | 1.3 | 0.187 | 0.014 | 0.06 | 0.24 | 0.811 |
| VNM | urbanLevelLDC:year | -0.23 | 0.23 | -0.99 | 0.321 | - | - | - | - |
| VNM | urbanLevelRUR:year | -0.32 | 0.22 | -1.5 | 0.139 | - | - | - | - |
| ZWE | (Intercept) | 28 | 2000 | 0.014 | 0.989 | 4.7e-11 | 1400 | 3.3e-14 | 1 |
| ZWE | urbanLevelRUR | -1200 | 2200 | -0.52 | 0.603 | - | - | - | - |
| ZWE | year | -0.01 | 0.97 | -0.011 | 0.992 | -8.70E-19 | 0.71 | -1.20E-18 | 1 |
| ZWE | urbanLevelRUR:year | 0.57 | 1.1 | 0.52 | 0.603 | - | - | - | - |

# Table S7 Changes in blackout duration and frequency of storms with blackouts detected for low-income countries.

| **ISO3** | **Coefficient** | **Blackout duration** | | | | **Storm frequency** | | | |
| --- | --- | --- | --- | --- | --- | --- | --- | --- | --- |
| **Estimate** | **Std. Error** | **t value** | **Pr(>|t|)** | **Estimate** | **Std. Error** | **t value** | **Pr(>|t|)** |
| MDG | (Intercept) | 1000 | 1200 | 0.88 | 0.385 | 190 | 240 | 0.81 | 0.418 |
| MDG | urbanLevelLDC | -1100 | 1300 | -0.8 | 0.427 | - | - | - | - |
| MDG | urbanLevelRUR | -1300 | 1200 | -1 | 0.313 | - | - | - | - |
| MDG | year | -0.52 | 0.59 | -0.87 | 0.386 | -0.094 | 0.12 | -0.81 | 0.419 |
| MDG | urbanLevelLDC:year | 0.53 | 0.66 | 0.8 | 0.427 | - | - | - | - |
| MDG | urbanLevelRUR:year | 0.63 | 0.61 | 1 | 0.311 | - | - | - | - |
| MOZ | (Intercept) | 630 | 720 | 0.88 | 0.406 | 4.7e-11 | 300 | 1.6e-13 | 1 |
| MOZ | urbanLevelLDC | 2000 | 1100 | 1.9 | 0.106 | - | - | - | - |
| MOZ | urbanLevelRUR | 0.38 | 1.9 | 0.2 | 0.844 | - | - | - | - |
| MOZ | year | -0.31 | 0.35 | -0.88 | 0.408 | 0 | 0.15 | 0 | 1 |
| MOZ | urbanLevelLDC:year | -1 | 0.54 | -1.9 | 0.106 | - | - | - | - |
| PRK | (Intercept) | -46 | 300 | -0.15 | 0.877 | -6.9 | 250 | -0.028 | 0.978 |
| PRK | urbanLevelLDC | -74 | 340 | -0.22 | 0.828 | - | - | - | - |
| PRK | urbanLevelRUR | -230 | 320 | -0.73 | 0.468 | - | - | - | - |
| PRK | year | 0.025 | 0.15 | 0.17 | 0.864 | 0.0037 | 0.12 | 0.03 | 0.976 |
| PRK | urbanLevelLDC:year | 0.037 | 0.17 | 0.22 | 0.827 | - | - | - | - |
| PRK | urbanLevelRUR:year | 0.12 | 0.16 | 0.73 | 0.467 | - | - | - | - |
| SOL | (Intercept) | 120 | 350 | 0.34 | 0.736 | 4.7e-11 | 380 | 1.2e-13 | 1 |
| SOL | urbanLevelRUR | -0.41 | 1.5 | -0.28 | 0.78 | - | - | - | - |
| SOL | year | -0.057 | 0.17 | -0.33 | 0.744 | -1.30E-19 | 0.19 | -7.00E-19 | 1 |
| SOM | (Intercept) | -260 | 410 | -0.64 | 0.526 | 4.7e-11 | 380 | 1.2e-13 | 1 |
| SOM | urbanLevelRUR | -2.2 | 1 | -2.1 | **0.037** | - | - | - | - |
| SOM | year | 0.13 | 0.21 | 0.65 | 0.518 | -1.30E-19 | 0.19 | -7.00E-19 | 1 |
